# Supplementary material
Source: PubMed Central journal article supplement (PMC10617557)
Supplement: aem.00165-23-s0002.pdf [file aem.00165-23-s0002.pdf]

# CFU

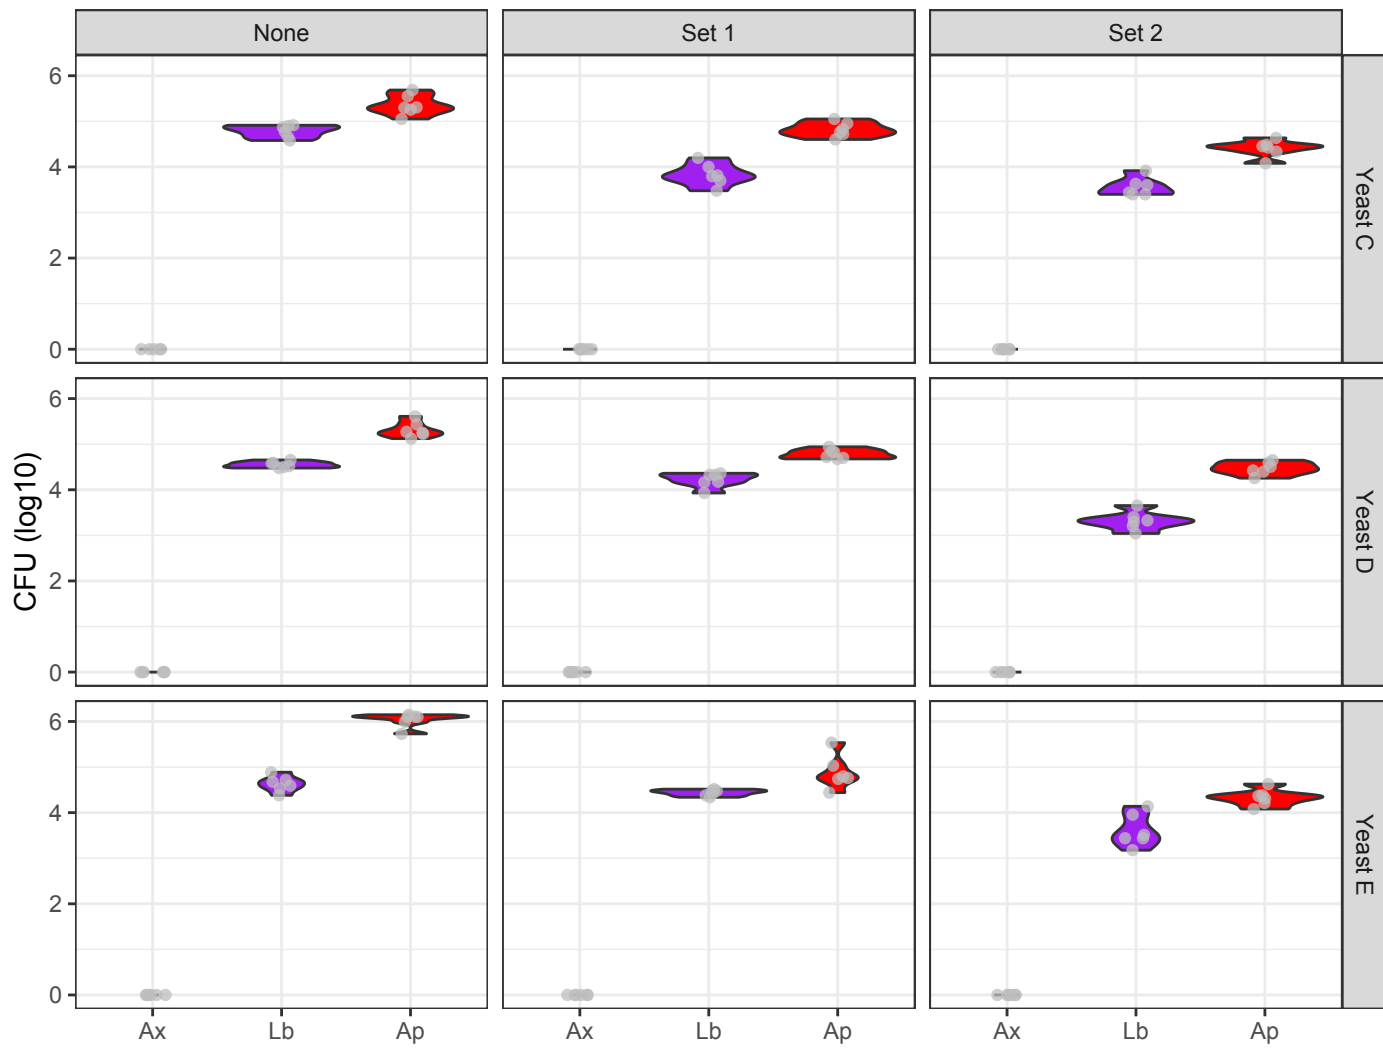

**Figure S1. Yeast batch and preservatives repress *A. pomorum* growth in the fly on a range of dietary yeasts.** Panels show CFUs isolated from flies reared axenically, with *A. pomorum*, or with *L. brevis*, separated by preservative conditions (columns, shown at top), and yeast batch (rows, shown at side). For both species, preservative set 2 reduces CFU levels in comparison to no preservatives, with yeast E having the largest log decrease in CFUs for *A. pomorum*.
