# Supplementary material
Source: PubMed Central journal article supplement (PMC10617557)
Supplement: aem.00165-23-s0003.pdf [file aem.00165-23-s0003.pdf]

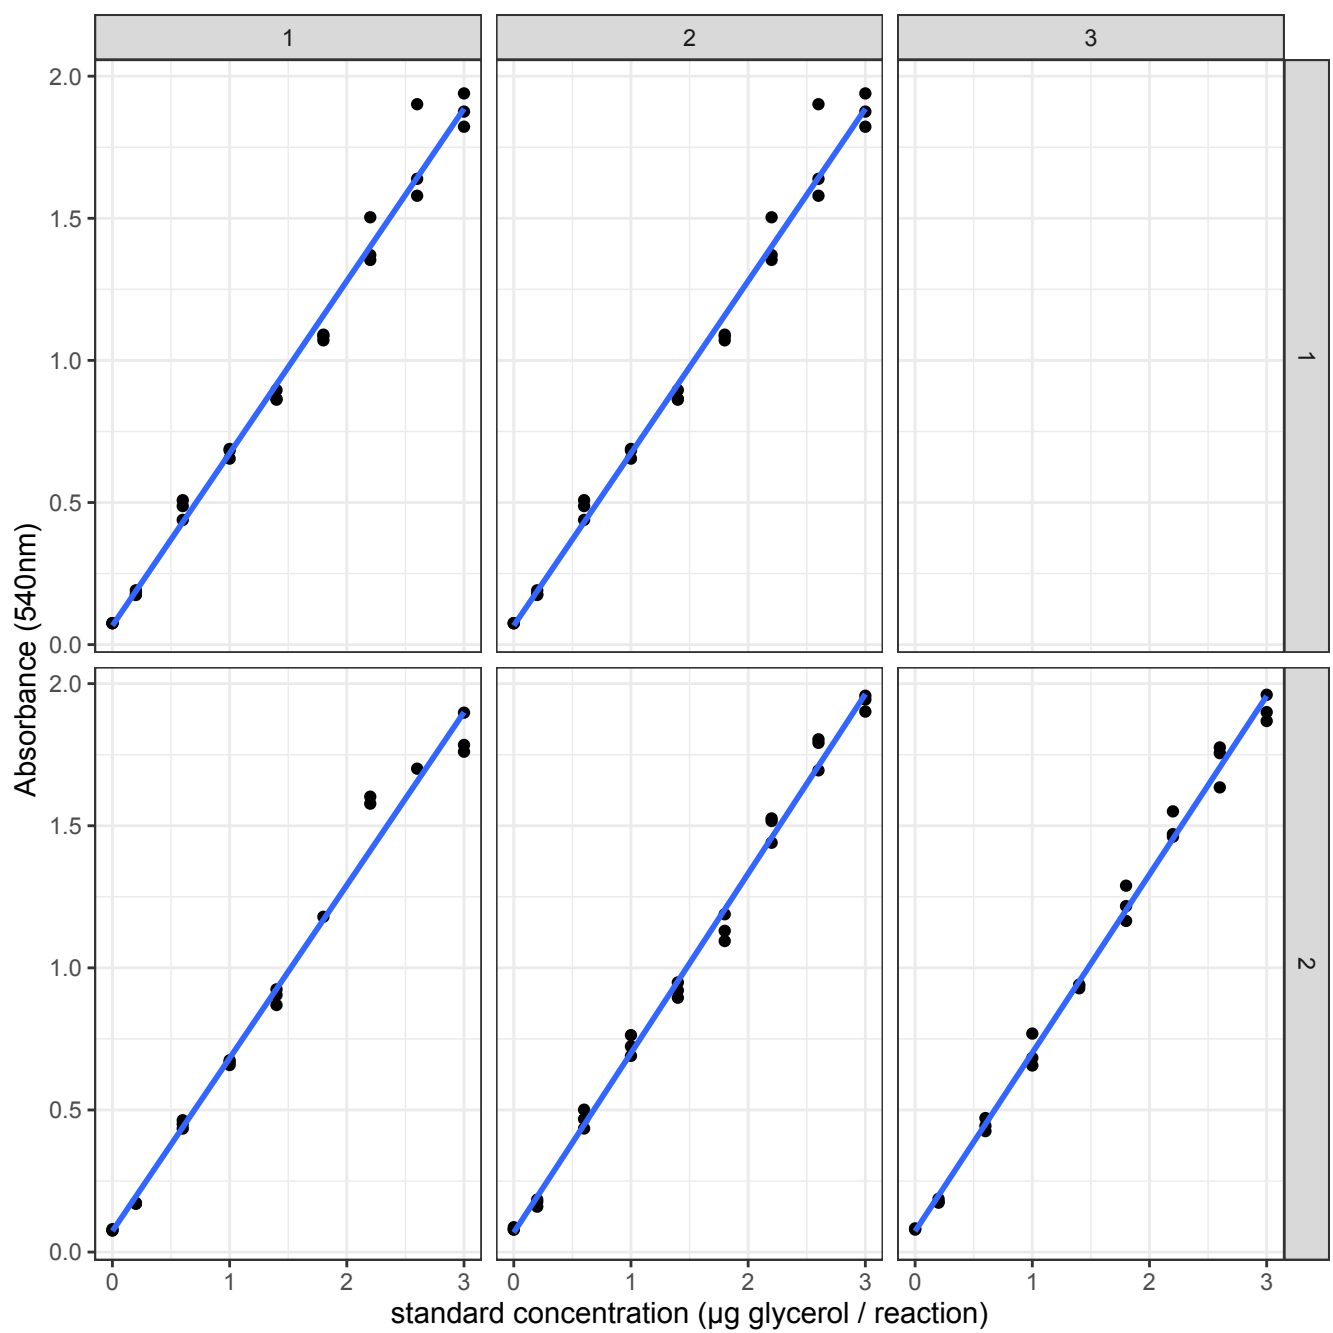

**Figure S2. Technical repeatability between experiments 1 and 2.** Panels show standard curves for each 96-well plate of assays in the two experiments presented in Figure 1. Rows denote two different experiments (1=data from Figure 1A-B; 2=data from Figure 1C-D). No significant differences in curves were detected (see Supplemental Text).
